# Supplementary material
Source: Research Square preprint supplement (doi:10.21203/rs.3.rs-10203376/v1)
Supplement: Supplementary file 1 [file 5e7a63cf9e71bcfa35e59286.docx]

Table 1. Summary the optimization of the reaction condition for the hydrogenation of nitrobenzene in the model reaction (bellow scheme)

| Entry | Catalyst | Amount(mg) | Temp.(°C) | NaOH(eq) | Time(h) | Yield (%) |
| --- | --- | --- | --- | --- | --- | --- |
| 1 | A | 20 | 83 | 3 | 24 | 49 |
| 2 | B | 20 | 83 | 3 | 24 | 45 |
| 3 | C | 20 | 83 | 3 | 24 | 11 |
| 4 | D | 20 | 83 | 3 | 24 | 72 |
| 5 | Fe3O4 | 20 | 83 | 3 | 12 | 69 |
| 6 | CNT aerogel | 20 | 83 | 3 | 18 | 37 |
| 1 | D | 20 | 83 | 3 | 24 | 72 |
| 2 | D | 10 | 83 | 3 | 24 | 67 |
| 3 | D | 30 | 83 | 3 | 24 | 50 |
| 4 | D | 40 | 83 | 3 | 24 | 49 |
| 5 | D | 20 | 63 | 3 | 24 | 39 |
| 6 | D | 20 | 73 | 3 | 24 | 45 |
| 7 | D | 20 | 83 | 1 | 24 | 25 |
| 8 | D | 20 | 83 | 2 | 24 | 49 |
| 9 | D | 20 | 83 | 4 | 24 | 52 |
| 10 | D | 20 | 83 | 3 | 2 | 58 |
| 11 | D | 20 | 83 | 3 | 6 | 68 |
| 12 | D | 20 | 83 | 3 | 8 | 63 |
| 13 | D | 20 | 83 | 3 | 12 | 54 |
| 14 | D | 20 | 83 | 3 | 18 | 42 |

Table 2. Hydrogenation reaction of various nitro aromatic substrates catalyzed by Fe3O4-CNT aerogel. a Reaction condition: nitro aromatic substrates (1 mmol), Fe3O4-CNT aerogel (20 mg), isopropanol (5 mL), 83 °C, 12 mg NaOH, 24 h, nitrogen atmosphere

| Entry | R | Conv (%) | Yield (%) |
| --- | --- | --- | --- |
| 1 | 3-amino | 68 | 68 |
| 2 | 4-amino | 33 | 33 |
| 3 | 2-CHO | 100 | 84 |
| 4 | 3-carbaldehyde | 100 | 50 |
| 5 | 4- carbaldehyde | 100 | 61 |
| 6 | 3-hydroxy | 100 | 74 |
| 7 | 4- hydroxy | 0 | 0 |
| 8 | 3-methyl | 100 | 60 |
| 9 | 4-methyl | 100 | 51 |
| 10 | 3-chloro | 100 | 71 |
| 12 | 2,4-dichloro | 77 | 77 |
| 13 | 4-bromo | 90 | 90 |
| 14 | 3,4-diamino | 55 | 33 |
| 15 | 1-nitronaphtalene | 100 | 44 |
| 16 | 3-aceyl | 100 | 53 |
| 17 | 2-carboxylic acid | 100 | 62 |
| 18 | 3-carboxylic acid | 100 | 66 |
| 19 | 3-chloro-4-carboxylic acid | 100 | 71 |
| 20 | 3-nitro-5-carboxylic acid | 31 | 0 |
| 21 | 2-hydroxy-5-nitro | 0 | 0 |
| 22 | 2-amino-5-nitro | 0 | 0 |
| 23 | 2-chloromethyl | 79 | 41 |
| 24 | 4-bromomethyl | 85 | 22 |

Table 3. Comparative overview of catalytic activity of the synthesized catalyst and reported catalytic systems for nitroarene reduction.

| Entry | Catalyst | Hydrogen Source | Reaction condition | Yield (%) | Ref. |
| --- | --- | --- | --- | --- | --- |
| 1 | Co−N/Al2O3 | Isopropanol | 110-150 °C, 24-48 h | 98 | [49] |
| 2 | GD-IO-Ag | Isopropanol | 100 °C, 24 h | 96 | [13] |
| 3 | Ru-Ni/CB | Isopropanol | 240 ◦C, 2 h | 96 | [50] |
| 4 | [Fe] | Isopropanol | 80 °C,24 h | 83 | [51] |
| 5 | CNT/CS@Au/Ag aerogel | Isopropanol | 83 ° C,24 h | 78 | [39] |
| 6 | ZrO2 | supercritical isopropanol | 600° C,20.0 MPa | 81 | [52] |
| 7 | Fe3O4-CNT aerogel | Isopropanol | 83 ° C,24 h | 72 | This work |
