# Supplementary material
Source: Research Square preprint supplement (doi:10.21203/rs.3.rs-10203376/v1)
Supplement: Supplementary file 2 [file f01f6f63470cfd22126d266a.docx]

**Supporting information**

**Magnetic carbon aerogel catalyst for nitro reduction by a liquid organic hydrogen carrier, considering the effect of preparation method on catalytic activity**

Anahita Arastofar, Hossein Tavakol*

*Department of Chemistry, Isfahan University of Technology, Isfahan 84156-83111, Iran; Tell (Fax): +98-31-33913241; E-mail:* [*h_tavakol@iut.ac.ir*](mailto:h_tavakol@iut.ac.ir) ; [a.arastofar@ch.iut.ac.ir](mailto:a.arastofar@ch.iut.ac.ir)

| 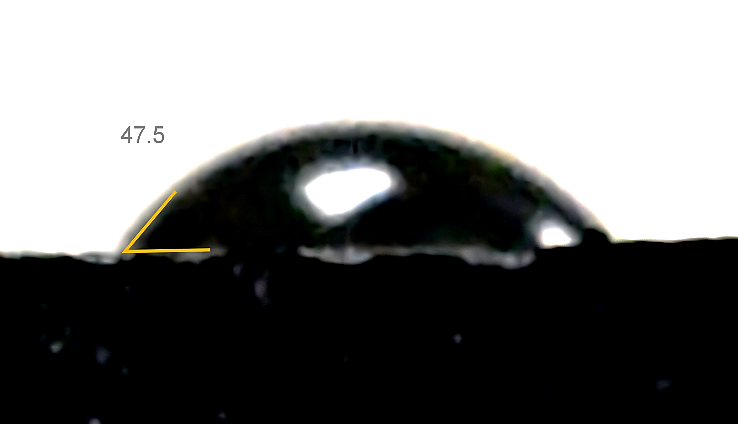  b) | 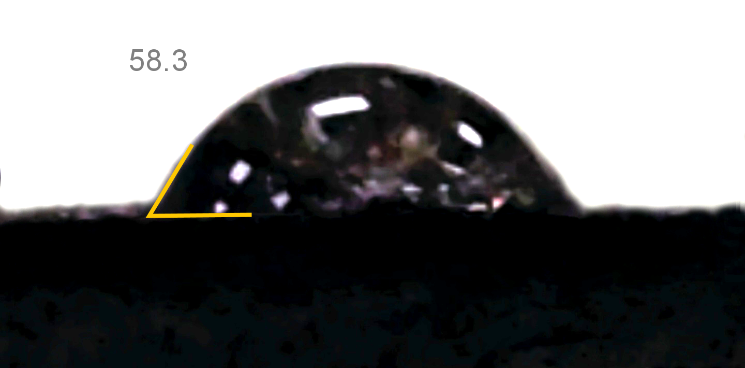  a) |
| --- | --- |
| Figure S1. Water contact angle images of (a) CNT aerogel and (b) Fe₃O₄–CNT magnetic aerogel. | | |

|  |
| --- |
| |  |  | | --- | --- |   Figure S2. The UV-Vis spectra (left) and standard diagram (right) for correlation between the adsorption of aniline solutions at 232 nm and their concentrations. |

|  |
| --- |
| Figure S3. UV–Vis absorption spectra for the optimization of catalyst loading. |

|  |
| --- |
| Figure S4. UV–Vis absorption spectra for the optimization of reaction temperature. |

|  |
| --- |
| Figure S5. UV–Vis absorption spectra for the optimization of NaOH amount. |

|  |
| --- |
| Figure S6. UV–Vis absorption spectra for the optimization of reaction time. |
